# Supplementary material
Source: PubMed Central journal article supplement (PMC4241130)
Supplement: NIHMS629748-supplement-Supplemental_Material.pdf [file NIHMS629748-supplement-Supplemental_Material.pdf]

## SUPPLEMENTAL MATERIAL

### SUPPLEMENTAL METHODS

#### **Animal Studies**

All animal experiments and euthanasia protocols were conducted in strict accordance with the NIH guidelines for humane treatment of animals and approved by the IACUC Committee at the Sanford-Burnham Medical Research Institute at Lake Nona. Inducible adult PGC-1 $\alpha\beta^{-/-}$  mouse model (PGC-1 $\alpha\beta^{-/-}$ ) in C57BL6/sv129 hybrid background has been previously described.<sup>1</sup> PGC-1 $\alpha\beta$  double deficiency was induced by intraperitoneal injection of 50 mg/kg/day of tamoxifen (Sigma) dissolved in sunflower seed oil (Sigma) for 2 days, at the age of 2 months, and was compared directly with their sex-matched littermates injected with vehicle (PGC-1 $\alpha^{-/-}$ ). Mice were harvested 1 month after injection of tamoxifen or vehicle as described below.

#### **Mouse surgery**

The transverse aortic constriction (TAC) and heart failure [combination of TAC and small apical myocardial infarction (MI)] surgeries were performed on 8-week-old female C57BL6/J mice. TAC, a surgical insult to induce compensated left ventricular hypertrophy (CH group), has been described.<sup>2</sup> Briefly, mice were anesthetized with ketamine [87mg/kg] / xylazine [13mg/kg]. Following aortic dissection through intercostal muscles, a 7.0 silk suture was tied around a blunt 26-28 gauge needle placed over the transverse aorta. The needle was removed to introduce a tight constriction. Combining TAC and MI surgery is a method to induce decompensated heart failure (HF group). Immediately following the TAC surgery, described above, a left thoracotomy was performed, and the left ventricle and left main coronary artery system exposed.

The left anterior descending branch (LAD) of the left coronary artery was ligated with a 9-0 nylon suture approximately  $\frac{1}{4}$  distance from the apex to create a small distal MI. Four weeks post-surgery, food was removed at 0900 for 4 hours, the bi-ventricle was excised as stated below for each endpoint. Prior to analysis of all samples, the infarcted apical region was removed from the hearts of the HF mice (and the corresponding cardiac tissue region was removed from sham-operated controls). 2-3 hearts per sample were pulverized, pooled, and split for transcriptomic and metabolomic analysis.

### **Echocardiography**

Echocardiography was performed non-invasively using a Vevo 2100 microultrasound System (VisualSonics Inc, Toronto, Ontario, Canada) as described.<sup>3,4</sup> Briefly, adult mice were anesthetized with an intraperitoneal injection (0.05 mg/g) of 2% avertin (to maintain heart rate close to 600 beats per minute or above in order to evaluate left ventricular systolic function) which was followed by continuous inhalation of 1-1.5% gaseous isoflurane administered through a customized nose cone for detailed cardiac morphometric analysis. Complete 2D and Doppler ultrasound examinations were performed using multiple views. The following cardiac function parameters were collected: heart rate (HR), end diastolic volume (EDV), end systolic volume (ESV), ejection fraction (EF), and velocity time integral (VTI) ratio, a ratio of blood flow velocity at the TAC constriction band site to that at the left ventricular outflow tract, used to confirm significant aortic constriction.

### **Exercise training**

Mice were exercise-trained following a modified version of the voluntary running-wheel

protocol described previously.<sup>5</sup> Two-month-old female C57BL/6 mice were housed for two months in individual cages equipped with 4.5” diameter Run-Around exercise wheels (Super Pet, Elk Grove village, IL). The daily running distances were recorded and monitored via a Bell F12 cyclocomputer (Easton-Bell Sports, Van Nuys, CA). Mice that did not run at least 5 miles per night were removed from the study. Twenty-four hours after removing the exercise wheels, food was removed at 0900 for 4 hours, the bi-ventricle was excised, rinsed in PBS, and freeze-clamped in liquid nitrogen. 2-3 hearts per sample were pulverized, pooled, and split for transcriptomic and metabolomic analysis.

### **RNA analysis and RT-PCR**

Total RNA was isolated from mouse bi-ventricle using the RNAzol method (Tel-Test). Quantitative real-time RT-PCR was performed as previously described.<sup>6</sup> In brief, total RNA was isolated and reverse transcribed with AffinityScript QPCR cDNA Synthesis Kit (Ailgent Technologies). PCR reactions were performed in triplicate in a 96-well format using a MX3005P Real-Time PCR System (Stratagene). The mouse-specific primer sets (SYBR green) used to detect specific gene expression can be found in Supplemental Table 1. 36B4 primer set was included in a separate well (in triplicate) and used to normalize the gene expression data.

### **Immunoblotting studies**

Western blotting was performed with bi-ventricle protein lysates as previously described.<sup>7</sup> The following antibodies were used: Rabbit polyclonal MCAD antibody;<sup>8</sup> Rabbit polyclonal LCAD and VLCAD antibodies (provided by Arnold W. Strauss, University of Cincinnati College of Medicine) as previously described;<sup>9,10</sup> Ribosomal protein s6 (S6RP) (Cell Signaling Technology

No. 2217S). Detection was performed by measuring the chemiluminescent signal as assayed by SuperSignal Dura (Pierce).

### **Mitochondrial respiration**

Mitochondrial respiration rates were determined on saponin-permeabilized left ventricular muscle strips with palmitoylcarnitine (20 $\mu$ M)/malate (5mM) and pyruvate (10mM)/malate (5mM) as substrate as previously described.<sup>11</sup> In brief, 3 month-old female C57BL/6 mice (one month post-surgery) were euthanized by CO<sub>2</sub> inhalation. The muscle fibers from left ventricular myocardium were separated and then transferred to a buffer (2.77 mM K<sub>2</sub>Ca-EGTA, 7.23 mM K<sub>2</sub>EGTA, 6.56 mM MgCl<sub>2</sub>, 20 mM imidazole, 53.3 mM K-MES, 20 mM taurine, 5.3 mM ATP, 15 mM PCr, 3 mM KH<sub>2</sub>PO<sub>4</sub>, 0.5 mM DTT [pH 7.1]) supplemented with 50  $\mu$ g/ml saponin and permeabilized for 30 min at 4°C with gentle stirring. Fibers were then washed twice for 10 min each (2.77 mM K<sub>2</sub>Ca-EGTA, 7.23 mM K<sub>2</sub>EGTA, 1.38 mM MgCl<sub>2</sub>, 20 mM imidazole, 100 mM K-MES, 20 mM taurine, 3 mM KH<sub>2</sub>PO<sub>4</sub>, 0.5 mM DTT, 2 mg/ml BSA [pH 7.1]). Mitochondrial respiration was performed at 25°C using an optical probe (Oxygen FOXY Probe, Ocean Optics). Following measurement of basal respiration, maximal (ADP-stimulated) respiration was determined by exposing the mitochondria to 1 mM ADP. Uncoupled respiration was evaluated following addition of oligomycin (1  $\mu$ g/mL). The solubility of oxygen in the respiration buffer at 25°C was taken as 230 nmol O<sub>2</sub> per milliliter. Respiration rates were expressed as “nmol O<sub>2</sub> min<sup>-1</sup> mg dry weight<sup>-1</sup>”.

### **Gene Microarray and Pathway Analysis**

To conduct transcriptomics analysis in mouse heart, immediately following deep anesthesia by

intraperitoneal injection of pentobarbital (100mg/kg body weight), bi-ventricle was excised, rinsed in PBS, and freeze-clamped in liquid nitrogen. Total RNA was isolated from powdered bi-ventricle using the RNazol method (Tel-Test). The Analytical Genomics Core at Sanford-Burnham Medical Research Institute performed gene microarray studies by using Affymetrix GeneChip Mouse Gene 1.0 ST array. The Affymetrix probe level data was processed using Robust Multi-Array Analysis (RMA) to obtain normalized summary scores of expression for each probe set on each array.<sup>12</sup> EBarrays was used to identify genes differentially expressed in any two conditions,<sup>13,14</sup> including CH vs sham, HF vs sham, Run (PH) vs Sedentary. R was used for both RMA and EBarrays analysis. The list of genes with posterior probabilities greater than or equal to 0.95 (expected FDR less than 5%) was considered a regulated gene. Linear regression analysis (Igor Pro, Wavemetrics) was used to assess the correlation between the fold change in gene expression between CH and HF models. All genes in the canonical pathways of Fatty Acid Metabolism, Tricarboxylic Acid (TCA) Cycle, and Oxidative Phosphorylation defined by Ingenuity Pathway Analysis (IPA; version #11631407) were used to create the heat map. The heat map for transcriptomics was generated by using the log<sub>2</sub>-transformed fold change of average expression in experimental group vs control, including CH vs sham, HF vs sham, Run (PH) vs Sedentary, and PGC-1 $\alpha^{\beta^{-}}$  vs. PGC-1 $\alpha^{-}$  control. The gene array data discussed in this publication have been deposited in NCBI's Gene Expression Omnibus and are accessible through GEO Series accession number GSE56348. The following link has been created to allow review of record GSE56348 prior to publication:

<http://www.ncbi.nlm.nih.gov/geo/query/acc.cgi?token=mxavguwebfaptcp&acc=GSE56348>

For pathway analysis, either upregulated or downregulated genes were uploaded into Ingenuity Pathway Analysis (IPA) software. The core analysis was used to interpret data, and the

pathways were reviewed using the canonical pathways defined by IPA (Version #17199142). The p value was calculated using Fisher's exact test. The pathways with a p value less than 0.05 were considered a regulated pathway. Canonical pathways were grouped into the function category defined by IPA, which is ranked by the total number of pathways regulated in the category. To map the genes regulated in canonical pathways defined by IPA, the genes with posterior probabilities greater than or equal to 0.95 were uploaded into IPA, and the genes in the biopathway as well as the directionality of regulation were reviewed.

### **Metabolomics**

To conduct metabolomics analysis in mouse heart, immediately following deep anesthesia by intraperitoneal injection of pentobarbital (100mg/kg body weight), bi-ventricle was excised, rinsed in PBS, and freeze-clamped in liquid nitrogen. Specimens of powdered bi-ventricle tissue were diluted 20-fold (mass:volume) in 50% acetonitrile supplemented with 0.3% formate (acylcarnitines, amino acids, and organic acids). Samples were homogenized in a TissueLyser II (Qiagen). Tissue extracts were derivatized and analyzed as previously described.<sup>15</sup> Levels of amino acids, acylcarnitines, and organic acids were determined using stable isotope dilution techniques. Amino acid and acylcarnitine measurements prepared from tissue homogenate and plasma were made using flow injection tandem mass spectrometry using sample preparation methods described previously.<sup>16,17</sup> The data were acquired using a Waters Acquity™ UPLC system equipped with a TQ (triple quadrupole) detector and a data system controlled by MassLynx 4.1 operating system (Waters, Milford, MA). Organic acids were quantified using methods described previously,<sup>18</sup> employing Trace Ultra GC coupled to a Trace DSQ MS operating under Excalibur 1.4 (Thermo Fisher Scientific, Austin, TX). The heat map for

metabolomics was generated using the log<sub>2</sub>-transformed fold change of average value of metabolites in experimental group vs control, including CH vs sham, HF vs sham, Run (PH) vs Sedentary, and PGC-1 $\alpha$  $\beta^{-/-}$  vs. PGC-1 $\alpha^{-/-}$  control.

**Supplemental Table 1. Mouse primer sequences for qRT-PCR analysis.**

| <b>Primers</b> | <b>Forward</b>         | <b>Reverse</b>        |
|----------------|------------------------|-----------------------|
| Slc27a1        | ATCTACGGGTTGACGGTGGTA  | GGTAGCGGCAGATTTACCTA  |
| Cpt1b          | ATGTCTACCTCCGAAGCAGGA  | GCTGCTTGCACATTTGTGTTT |
| Cpt2           | GCACAGAAGCCTCTCTTGAATG | TCTGTTTATCCTGAGCGAGCA |
| Acadv1         | ATCTCTGCCAGCGACTTT     | TTCTGGCTTGTCCAGAACTG  |
| Ehhadh         | GCCATAGTGATCTGTGGAGCA  | CCACCACTGGCTTCTGGTATC |
| 36B4           | TGGAAGTCCAACACTTCCTCAA | ATCTGCTGCATCTGCTTGGAG |



**Supplemental Table 2. Echocardiographic analysis of HF mice.**

| <b>Parameters</b> | <b>Sham (HF)</b> | <b>HF</b>      | <b>p-value</b> |
|-------------------|------------------|----------------|----------------|
| N                 | 5                | 23-24          |                |
| HR (bpm)          | 615.0 ± 14.5     | 608.0 ± 36.84  | 0.44           |
| EF (%)            | 69.51 ± 3.63     | 38.42 ± 12.78* | <0.001         |
| EDV (ul)          | 27.14 ± 6.08     | 59.69 ± 16.07* | <0.001         |
| ESV (ul)          | 8.35 ± 2.62      | 38.32 ± 17.10* | <0.001         |
| VTI ratio         | 0.63 ± 0.12      | 5.89 ± 1.71*   | <0.001         |

\*p < 0.05 compared with sham (HF). HR, Heart rate; EF, Ejection fraction; EDV, End diastolic volume; ESV, End systolic volume; VTI ratio, Velocity time integral ratio.

**Supplemental Table 3. Pathways containing upregulated or downregulated genes in CH myocardium.**

| Pathway/Function Categories         | Pathways                                                             | # of genes regulated | # of genes in pathway | p-Value |
|-------------------------------------|----------------------------------------------------------------------|----------------------|-----------------------|---------|
| <b>Downregulated</b>                |                                                                      |                      |                       |         |
| <i>Lipid Metabolism</i>             | LPS/IL-1 Mediated Inhibition of RXR Function                         | 12                   | 215                   | <0.001  |
|                                     | PXR/RXR Activation                                                   | 6                    | 60                    | <0.001  |
|                                     | Glutaryl-CoA Degradation                                             | 3                    | 11                    | <0.001  |
|                                     | AMPK Signaling                                                       | 7                    | 134                   | 0.006   |
|                                     | Noradrenaline and Adrenaline Degradation                             | 3                    | 29                    | 0.012   |
|                                     | Fatty Acid $\beta$ -oxidation I                                      | 3                    | 30                    | 0.013   |
|                                     | Ubiquinol-10 Biosynthesis (Eukaryotic)                               | 2                    | 12                    | 0.014   |
|                                     | Glutathione Redox Reactions I                                        | 2                    | 16                    | 0.026   |
| <i>AA Metabolism</i>                | Valine Degradation I                                                 | 4                    | 18                    | <0.001  |
|                                     | Isoleucine Degradation I                                             | 3                    | 14                    | 0.002   |
|                                     | Branched-chain $\alpha$ -keto acid Dehydrogenase Complex             | 2                    | 4                     | 0.002   |
|                                     | Tryptophan Degradation X (Mammalian, via Tryptamine)                 | 2                    | 17                    | 0.030   |
|                                     | Putrescine Degradation III                                           | 2                    | 16                    | 0.030   |
|                                     | Dopamine-DARPP32 Feedback in cAMP Signaling                          | 6                    | 155                   | 0.046   |
| <i>Cell Signaling</i>               | G-Protein Coupled Receptor Signaling                                 | 11                   | 253                   | 0.004   |
|                                     | Cellular Effects of Sildenafil (Viagra)                              | 7                    | 123                   | 0.005   |
|                                     | cAMP-mediated signaling                                              | 9                    | 211                   | 0.010   |
|                                     | Aryl Hydrocarbon Receptor Signaling                                  | 6                    | 139                   | 0.023   |
| <i>Carbohydrate Metabolism</i>      | Glutathione-mediated Detoxification                                  | 6                    | 23                    | <0.001  |
|                                     | tRNA Splicing                                                        | 3                    | 34                    | 0.020   |
| <i>Lipid and AA Metabolism</i>      | Tryptophan Degradation III (Eukaryotic)                              | 3                    | 20                    | 0.004   |
|                                     | Phenylalanine Degradation IV (Mammalian, via Side Chain)             | 2                    | 13                    | 0.020   |
| <i>Growth and Development</i>       | HIF1 $\alpha$ Signaling                                              | 5                    | 101                   | 0.026   |
| <i>Other</i>                        | Xenobiotic Metabolism Signaling                                      | 12                   | 264                   | <0.001  |
|                                     | Myo-inositol Biosynthesis                                            | 2                    | 4                     | 0.002   |
|                                     | Serotonin Degradation                                                | 3                    | 47                    | 0.031   |
|                                     | D-myo-inositol (1,4,5)-trisphosphate Degradation                     | 2                    | 18                    | 0.037   |
|                                     | Dopamine Degradation                                                 | 2                    | 20                    | 0.042   |
| <b>Upregulated</b>                  |                                                                      |                      |                       |         |
| <i>Immune/Inflammatory Response</i> | IL-8 Signaling                                                       | 13                   | 183                   | 0.014   |
|                                     | HMGB1 Signaling                                                      | 8                    | 92                    | 0.019   |
|                                     | iNOS Signaling                                                       | 5                    | 45                    | 0.021   |
|                                     | Regulation of IL-2 Expression in Activated and Anergic T Lymphocytes | 7                    | 82                    | 0.021   |
|                                     | Interferon Signaling                                                 | 4                    | 29                    | 0.021   |
|                                     | MIF-mediated Glucocorticoid Regulation                               | 4                    | 33                    | 0.027   |
|                                     | Chemokine Signaling                                                  | 6                    | 66                    | 0.033   |
|                                     | TREM1 Signaling                                                      | 5                    | 54                    | 0.037   |
|                                     | Toll-like Receptor Signaling                                         | 5                    | 53                    | 0.037   |
|                                     | Prostanoid Biosynthesis                                              | 2                    | 9                     | 0.042   |
|                                     | CXCR4 Signaling                                                      | 10                   | 152                   | 0.046   |
|                                     | CCR3 Signaling in Eosinophils                                        | 8                    | 114                   | 0.048   |
| <i>Growth and Development</i>       | TGF- $\beta$ Signaling                                               | 9                    | 84                    | 0.003   |
|                                     | Role of NFAT in Cardiac Hypertrophy                                  | 14                   | 182                   | 0.004   |
|                                     | VEGF Signaling                                                       | 9                    | 94                    | 0.005   |
|                                     | Cardiac Hypertrophy Signaling                                        | 16                   | 219                   | 0.005   |
|                                     | Colorectal Cancer Metastasis Signaling                               | 16                   | 237                   | 0.010   |
|                                     | Glucocorticoid Receptor Signaling                                    | 16                   | 264                   | 0.022   |
|                                     | Cardiomyocyte Differentiation via BMP Receptors                      | 3                    | 19                    | 0.023   |
|                                     | Melanocyte Development and Pigmentation Signaling                    | 7                    | 83                    | 0.031   |
|                                     | Neuregulin Signaling                                                 | 7                    | 93                    | 0.032   |
|                                     | Pancreatic Adenocarcinoma Signaling                                  | 8                    | 111                   | 0.042   |
| <i>Cell Signaling</i>               | RhoA Signaling                                                       | 11                   | 114                   | 0.003   |
|                                     | Gap Junction Signaling                                               | 12                   | 152                   | 0.009   |
|                                     | Sphingosine-1-phosphate Signaling                                    | 9                    | 109                   | 0.014   |
|                                     | Synaptic Long Term Depression                                        | 10                   | 142                   | 0.026   |

|                                           |                                                                                |    |     |        |
|-------------------------------------------|--------------------------------------------------------------------------------|----|-----|--------|
|                                           | Role of Macrophages, Fibroblasts and Endothelial Cells in Rheumatoid Arthritis | 17 | 300 | 0.030  |
|                                           | $\alpha$ -Adrenergic Signaling                                                 | 7  | 87  | 0.032  |
|                                           | G Beta Gamma Signaling                                                         | 7  | 97  | 0.038  |
|                                           | D-myo-inositol-5-phosphate Metabolism                                          | 9  | 132 | 0.043  |
| <i>Cellular Assembly and Organization</i> | Remodeling of Epithelial Adherens Junctions                                    | 8  | 65  | 0.002  |
|                                           | Epithelial Adherens Junction Signaling                                         | 12 | 142 | 0.005  |
|                                           | Actin Nucleation by ARP-WASP Complex                                           | 6  | 64  | 0.016  |
|                                           | Integrin Signaling                                                             | 13 | 202 | 0.026  |
|                                           | Axonal Guidance Signaling                                                      | 23 | 440 | 0.034  |
|                                           | Semaphorin Signaling in Neurons                                                | 5  | 51  | 0.040  |
|                                           | Germ Cell-Sertoli Cell Junction Signaling                                      | 10 | 154 | 0.049  |
| <i>Cellular Movement</i>                  | Hepatic Fibrosis / Hepatic Stellate Cell Activation                            | 21 | 137 | <0.001 |
|                                           | Macropinocytosis Signaling                                                     | 7  | 73  | 0.012  |
|                                           | Virus Entry via Endocytic Pathways                                             | 8  | 88  | 0.013  |
|                                           | Inhibition of Matrix Metalloproteases                                          | 4  | 37  | 0.047  |
| <i>Lipid Metabolism</i>                   | PPAR $\alpha$ /RXR $\alpha$ Activation                                         | 11 | 173 | 0.041  |
| <i>Other</i>                              | Endothelin-1 Signaling                                                         | 14 | 167 | 0.003  |
|                                           | eNOS Signaling                                                                 | 10 | 127 | 0.014  |
|                                           | Role of Osteoblasts, Osteoclasts and Chondrocytes in Rheumatoid Arthritis      | 14 | 219 | 0.027  |
|                                           | Apoptosis Signaling                                                            | 7  | 89  | 0.032  |
|                                           | Systemic Lupus Erythematosus Signaling                                         | 11 | 190 | 0.038  |
|                                           | UDP-N-acetyl-D-galactosamine Biosynthesis I                                    | 2  | 9   | 0.042  |

The p value was calculated by Fisher's exact test. p<0.05 was considered statistically significant.

**Supplemental Table 4. Pathways containing upregulated or downregulated genes in HF myocardium.**

| Pathway/Function Category                | Pathways                                                                     | # of genes regulated | # of genes in pathway | p-Value |
|------------------------------------------|------------------------------------------------------------------------------|----------------------|-----------------------|---------|
| <b>Downregulated</b>                     |                                                                              |                      |                       |         |
| <i>Lipid Metabolism</i>                  | Fatty Acid $\beta$ -oxidation I                                              | 8                    | 30                    | <0.001  |
|                                          | LPS/IL-1 Mediated Inhibition of RXR Function                                 | 20                   | 215                   | <0.001  |
|                                          | AMPK Signaling                                                               | 14                   | 134                   | <0.001  |
|                                          | Glutaryl-CoA Degradation                                                     | 4                    | 11                    | <0.001  |
|                                          | Oxidative Ethanol Degradation III                                            | 4                    | 28                    | 0.001   |
|                                          | Mitochondrial L-carnitine Shuttle Pathway                                    | 4                    | 18                    | 0.002   |
|                                          | Ethanol Degradation II                                                       | 5                    | 28                    | 0.002   |
|                                          | Ethanol Degradation IV                                                       | 4                    | 18                    | 0.002   |
|                                          | Noradrenaline and Adrenaline Degradation                                     | 5                    | 29                    | 0.002   |
|                                          | Fatty Acid $\beta$ -oxidation III (Unsaturated, Odd Number)                  | 2                    | 3                     | 0.003   |
|                                          | Stearate Biosynthesis I (Animals)                                            | 5                    | 34                    | 0.005   |
|                                          | Fatty Acid $\alpha$ -oxidation                                               | 3                    | 14                    | 0.009   |
|                                          | PXR/RXR Activation                                                           | 6                    | 60                    | 0.011   |
|                                          | Glutathione Redox Reactions I                                                | 3                    | 16                    | 0.013   |
| Triacylglycerol Degradation              | 3                                                                            | 23                   | 0.042                 |         |
| <i>AA Metabolism</i>                     | Tryptophan Degradation X (Mammalian, via Tryptamine)                         | 4                    | 17                    | 0.002   |
|                                          | Putrescine Degradation III                                                   | 4                    | 16                    | 0.002   |
|                                          | Leucine Degradation I                                                        | 3                    | 9                     | 0.003   |
|                                          | TR/RXR Activation                                                            | 8                    | 85                    | 0.006   |
|                                          | Branched-chain $\alpha$ -keto acid Dehydrogenase Complex                     | 2                    | 4                     | 0.007   |
|                                          | Valine Degradation I                                                         | 3                    | 18                    | 0.021   |
| <i>Immune/Inflammatory Response</i>      | IL-22 Signaling                                                              | 4                    | 24                    | 0.008   |
|                                          | Role of JAK2 in Hormone-like Cytokine Signaling                              | 4                    | 34                    | 0.022   |
|                                          | IL-9 Signaling                                                               | 4                    | 35                    | 0.027   |
|                                          | IL-3 Signaling                                                               | 6                    | 71                    | 0.029   |
|                                          | IL-2 Signaling                                                               | 5                    | 55                    | 0.033   |
| <i>Carbohydrate Metabolism</i>           | Glutathione-mediated Detoxification                                          | 5                    | 23                    | 0.001   |
|                                          | Type II Diabetes Mellitus Signaling                                          | 10                   | 127                   | 0.005   |
|                                          | Glycolysis I                                                                 | 3                    | 22                    | 0.037   |
|                                          | Gluconeogenesis I                                                            | 3                    | 23                    | 0.042   |
| <i>Cell Signaling</i>                    | Aryl Hydrocarbon Receptor Signaling                                          | 11                   | 139                   | 0.004   |
|                                          | RAR Activation                                                               | 13                   | 172                   | 0.004   |
|                                          | G-Protein Coupled Receptor Signaling                                         | 14                   | 253                   | 0.043   |
| <i>Growth and Development</i>            | Growth Hormone Signaling                                                     | 7                    | 69                    | 0.007   |
|                                          | FGF Signaling                                                                | 7                    | 86                    | 0.023   |
|                                          | Thrombopoietin Signaling                                                     | 5                    | 58                    | 0.035   |
| <i>Lipid and AA Metabolism</i>           | Proline Degradation                                                          | 2                    | 2                     | 0.001   |
|                                          | Tryptophan Degradation III (Eukaryotic)                                      | 4                    | 20                    | 0.003   |
| <i>Carbohydrate and AA Metabolism</i>    | Alanine Degradation III                                                      | 2                    | 2                     | 0.001   |
|                                          | Alanine Biosynthesis II                                                      | 2                    | 2                     | 0.001   |
| <i>Lipid and Carbohydrate Metabolism</i> | Acyl-CoA Hydrolysis                                                          | 3                    | 11                    | 0.005   |
| <i>Cellular Assembly and Orgnization</i> | GDNF Family Ligand-Receptor Interactions                                     | 6                    | 69                    | 0.028   |
| <i>Other</i>                             | Xenobiotic Metabolism Signaling                                              | 20                   | 264                   | <0.001  |
|                                          | Dopamine Degradation                                                         | 4                    | 20                    | 0.003   |
|                                          | NRF2-mediated Oxidative Stress Response                                      | 13                   | 182                   | 0.005   |
|                                          | Myo-inositol Biosynthesis                                                    | 2                    | 4                     | 0.007   |
|                                          | Histamine Degradation                                                        | 3                    | 13                    | 0.009   |
|                                          | Serotonin Degradation                                                        | 5                    | 47                    | 0.011   |
| <b>Upregulated</b>                       |                                                                              |                      |                       |         |
| <i>Immune/Inflammatory Response</i>      | IL-8 Signaling                                                               | 23                   | 183                   | <0.001  |
|                                          | TREM1 Signaling                                                              | 11                   | 54                    | <0.001  |
|                                          | Acute Phase Response Signaling                                               | 20                   | 163                   | <0.001  |
|                                          | Leukocyte Extravasation Signaling                                            | 22                   | 193                   | <0.001  |
|                                          | Dendritic Cell Maturation                                                    | 18                   | 172                   | 0.001   |
|                                          | Macropinocytosis Signaling                                                   | 11                   | 73                    | 0.001   |
|                                          | Agranulocyte Adhesion and Diapedesis                                         | 19                   | 166                   | 0.001   |
|                                          | Role of Pattern Recognition Receptors in Recognition of Bacteria and Viruses | 13                   | 95                    | 0.001   |

|                                           |                                                                                |    |     |        |
|-------------------------------------------|--------------------------------------------------------------------------------|----|-----|--------|
|                                           | Granulocyte Adhesion and Diapedesis                                            | 16 | 155 | 0.005  |
|                                           | Fcγ Receptor-mediated Phagocytosis in Macrophages and Monocytes                | 11 | 94  | 0.007  |
|                                           | Prostanoid Biosynthesis                                                        | 3  | 9   | 0.009  |
|                                           | Altered T Cell and B Cell Signaling in Rheumatoid Arthritis                    | 9  | 84  | 0.012  |
|                                           | T Helper Cell Differentiation                                                  | 8  | 68  | 0.012  |
|                                           | HMGB1 Signaling                                                                | 10 | 92  | 0.018  |
|                                           | Natural Killer Cell Signaling                                                  | 10 | 95  | 0.021  |
|                                           | IL-17 Signaling                                                                | 8  | 68  | 0.021  |
|                                           | NF-κB Activation by Viruses                                                    | 8  | 76  | 0.029  |
|                                           | IL-6 Signaling                                                                 | 11 | 116 | 0.030  |
|                                           | Antiproliferative Role of TOB in T Cell Signaling                              | 4  | 26  | 0.037  |
|                                           | NF-κB Signaling                                                                | 13 | 161 | 0.041  |
|                                           | Role of IL-17F in Allergic Inflammatory Airway Diseases                        | 5  | 42  | 0.044  |
| <i>Growth and Development</i>             | ILK Signaling                                                                  | 24 | 178 | <0.001 |
|                                           | Colorectal Cancer Metastasis Signaling                                         | 27 | 237 | <0.001 |
|                                           | VEGF Signaling                                                                 | 14 | 94  | <0.001 |
|                                           | Factors Promoting Cardiogenesis in Vertebrates                                 | 13 | 88  | <0.001 |
|                                           | Ovarian Cancer Signaling                                                       | 16 | 134 | 0.001  |
|                                           | Pancreatic Adenocarcinoma Signaling                                            | 14 | 111 | 0.001  |
|                                           | Wnt/β-catenin Signaling                                                        | 18 | 168 | 0.002  |
|                                           | TGF-β Signaling                                                                | 11 | 84  | 0.003  |
|                                           | Neuregulin Signaling                                                           | 11 | 93  | 0.003  |
|                                           | HGF Signaling                                                                  | 12 | 101 | 0.004  |
|                                           | Human Embryonic Stem Cell Pluripotency                                         | 14 | 142 | 0.006  |
|                                           | Role of NFAT in Cardiac Hypertrophy                                            | 17 | 182 | 0.006  |
|                                           | Melanocyte Development and Pigmentation Signaling                              | 10 | 83  | 0.008  |
|                                           | IGF-1 Signaling                                                                | 11 | 98  | 0.009  |
|                                           | Bladder Cancer Signaling                                                       | 10 | 88  | 0.011  |
|                                           | HIF1α Signaling                                                                | 11 | 101 | 0.012  |
|                                           | HER-2 Signaling in Breast Cancer                                               | 9  | 77  | 0.012  |
|                                           | Chronic Myeloid Leukemia Signaling                                             | 10 | 98  | 0.018  |
|                                           | Cardiac Hypertrophy Signaling                                                  | 18 | 219 | 0.024  |
|                                           | Molecular Mechanisms of Cancer                                                 | 25 | 347 | 0.028  |
|                                           | VEGF Family Ligand-Receptor Interactions                                       | 8  | 74  | 0.031  |
|                                           | Salvage Pathways of Pyrimidine Ribonucleotides                                 | 8  | 80  | 0.049  |
| <i>Cell Signaling</i>                     | Role of Macrophages, Fibroblasts and Endothelial Cells in Rheumatoid Arthritis | 35 | 300 | <0.001 |
|                                           | RhoA Signaling                                                                 | 13 | 114 | 0.005  |
|                                           | Signaling by Rho Family GTPases                                                | 21 | 239 | 0.006  |
|                                           | Aryl Hydrocarbon Receptor Signaling                                            | 14 | 139 | 0.006  |
|                                           | Sphingosine-1-phosphate Signaling                                              | 12 | 109 | 0.006  |
|                                           | Caveolar-mediated Endocytosis Signaling                                        | 9  | 78  | 0.009  |
|                                           | Rac Signaling                                                                  | 11 | 112 | 0.014  |
|                                           | Gα12/13 Signaling                                                              | 12 | 118 | 0.015  |
|                                           | p38 MAPK Signaling                                                             | 11 | 111 | 0.023  |
|                                           | RhoGDI Signaling                                                               | 15 | 184 | 0.028  |
|                                           | PI3K/AKT Signaling                                                             | 11 | 131 | 0.038  |
|                                           | Gap Junction Signaling                                                         | 13 | 152 | 0.039  |
|                                           | Docosahexaenoic Acid (DHA) Signaling                                           | 5  | 39  | 0.039  |
|                                           | Phospholipase C Signaling                                                      | 17 | 232 | 0.048  |
| <i>Cellular Assembly and Organization</i> | Epithelial Adherens Junction Signaling                                         | 20 | 142 | <0.001 |
|                                           | Axonal Guidance Signaling                                                      | 40 | 440 | <0.001 |
|                                           | Clathrin-mediated Endocytosis Signaling                                        | 21 | 180 | <0.001 |
|                                           | Actin Cytoskeleton Signaling                                                   | 21 | 222 | 0.002  |
|                                           | Remodeling of Epithelial Adherens Junctions                                    | 9  | 65  | 0.005  |
|                                           | Integrin Signaling                                                             | 18 | 202 | 0.010  |
|                                           | Paxillin Signaling                                                             | 11 | 108 | 0.012  |
|                                           | Ephrin Receptor Signaling                                                      | 16 | 188 | 0.013  |
|                                           | Germ Cell-Sertoli Cell Junction Signaling                                      | 14 | 154 | 0.020  |
|                                           | Semaphorin Signaling in Neurons                                                | 6  | 51  | 0.046  |
| <i>Cellular Movement</i>                  | Hepatic Fibrosis / Hepatic Stellate Cell Activation                            | 34 | 137 | <0.001 |
|                                           | Inhibition of Matrix Metalloproteases                                          | 8  | 37  | <0.001 |
|                                           | Atherosclerosis Signaling                                                      | 14 | 117 | 0.001  |
|                                           | Glioma Invasiveness Signaling                                                  | 9  | 57  | 0.002  |
|                                           | Role of Tissue Factor in Cancer                                                | 13 | 110 | 0.003  |
|                                           | Virus Entry via Endocytic Pathways                                             | 11 | 88  | 0.004  |
|                                           | Regulation of the Epithelial-Mesenchymal Transition Pathway                    | 17 | 185 | 0.010  |

|                         |                                                                           |    |     |        |
|-------------------------|---------------------------------------------------------------------------|----|-----|--------|
|                         | Oncostatin M Signaling                                                    | 5  | 33  | 0.025  |
| <i>Lipid Metabolism</i> | LXR/RXR Activation                                                        | 11 | 114 | 0.024  |
|                         | Fatty Acid $\alpha$ -oxidation                                            | 3  | 14  | 0.026  |
|                         | Eicosanoid Signaling                                                      | 7  | 60  | 0.033  |
|                         | Hepatic Cholestasis                                                       | 12 | 135 | 0.033  |
|                         | PPAR $\alpha$ /RXR $\alpha$ Activation                                    | 14 | 173 | 0.041  |
| <i>AA Metabolism</i>    | Proline Biosynthesis I                                                    | 2  | 4   | 0.015  |
|                         | Tryptophan Degradation X (Mammalian, via Tryptamine)                      | 3  | 17  | 0.046  |
|                         | Putrescine Degradation III                                                | 3  | 16  | 0.046  |
| <i>Other</i>            | Role of Osteoblasts, Osteoclasts and Chondrocytes in Rheumatoid Arthritis | 27 | 219 | <0.001 |
|                         | eNOS Signaling                                                            | 14 | 127 | 0.004  |
|                         | Amyotrophic Lateral Sclerosis Signaling                                   | 11 | 97  | 0.009  |
|                         | Intrinsic Prothrombin Activation Pathway                                  | 5  | 32  | 0.009  |
|                         | Dopamine Degradation                                                      | 4  | 20  | 0.014  |
|                         | Endothelin-1 Signaling                                                    | 15 | 167 | 0.020  |
|                         | Inhibition of Angiogenesis by TSP1                                        | 5  | 33  | 0.022  |
|                         | Tetrahydrofolate Salvage from 5,10-methenyltetrahydrofolate               | 2  | 5   | 0.024  |
|                         | Coagulation System                                                        | 5  | 35  | 0.028  |
|                         | Superoxide Radicals Degradation                                           | 2  | 6   | 0.035  |

The p value was calculated by Fisher's exact test.  $p < 0.05$  was considered statistically significant.

**Supplemental Table 5. Differentially expressed genes involved in fatty acid metabolism in CH and HF model.**

| Symbol   | Gene Name                                                          | CH     |              | HF     |              |
|----------|--------------------------------------------------------------------|--------|--------------|--------|--------------|
|          |                                                                    | FC     | DE           | FC     | DE           |
| Aldh1a1  | aldehyde dehydrogenase family 1, subfamily A1                      | 1.470  | <b>1.000</b> | 1.587  | <b>1.000</b> |
| Gcdh     | glutaryl-Coenzyme A dehydrogenase                                  | -1.385 | <b>0.999</b> | -1.361 | <b>1.000</b> |
| Slc27a1  | solute carrier family 27 (fatty acid transporter), member 1        | -1.443 | <b>0.999</b> | -1.490 | <b>1.000</b> |
| Eci1     | enoyl-Coenzyme A delta isomerase 1                                 | -1.289 | 0.557        | -1.357 | <b>1.000</b> |
| Acaa2    | acetyl-Coenzyme A acyltransferase 2                                | -1.335 | 0.545        | -1.404 | <b>1.000</b> |
| Adhfe1   | alcohol dehydrogenase, iron containing, 1                          | -1.274 | 0.104        | -1.427 | <b>1.000</b> |
| Aldh4a1  | aldehyde dehydrogenase 4 family, member A1                         | -1.256 | 0.535        | -1.335 | <b>1.000</b> |
| Aldh2    | aldehyde dehydrogenase 2, mitochondrial                            | -1.307 | <b>0.985</b> | -1.418 | <b>1.000</b> |
| Ech1     | enoyl coenzyme A hydratase 1, peroxisomal                          | -1.366 | 0.674        | -1.458 | <b>1.000</b> |
| Ehhadh   | enoyl-Coenzyme A, hydratase/3-hydroxyacyl Coenzyme A dehydrogenase | -1.486 | <b>0.984</b> | -1.908 | <b>1.000</b> |
| Aldh9a1  | aldehyde dehydrogenase 9, subfamily A1                             | -1.205 | 0.050        | -1.361 | <b>1.000</b> |
| Aldh1a2  | aldehyde dehydrogenase family 1, subfamily A2                      | 1.292  | 0.209        | 1.319  | <b>0.999</b> |
| Acadvl   | acyl-Coenzyme A dehydrogenase, very long chain                     | -1.232 | 0.106        | -1.267 | <b>0.998</b> |
| Cpt2     | carnitine palmitoyltransferase 2                                   | -1.297 | 0.827        | -1.321 | <b>0.998</b> |
| Cpt1a    | carnitine palmitoyltransferase 1a, liver                           | -1.202 | 0.328        | -1.348 | <b>0.998</b> |
| Acs15    | acyl-CoA synthetase long-chain family member 5                     | 1.238  | 0.319        | 1.257  | <b>0.996</b> |
| Hadh     | hydroxyacyl-Coenzyme A dehydrogenase                               | -1.220 | 0.040        | -1.264 | <b>0.994</b> |
| Acs16    | acyl-CoA synthetase long-chain family member 6                     | -1.195 | 0.536        | -1.242 | <b>0.953</b> |
| Hsd17b10 | hydroxysteroid (17-beta) dehydrogenase 10                          | -1.309 | <b>1.000</b> | -1.235 | 0.937        |

FC, fold change; DE, posterior probability of differential expression; genes with DE  $\geq$  0.950 (bolded) are significantly regulated.

**Supplemental Table 6. Differentially expressed genes involved in amino acid degradation pathways in CH and HF.**

| Symbol   | Gene Name                                                          | AA Degradation<br>Pathway | CH     |              | HF     |              |
|----------|--------------------------------------------------------------------|---------------------------|--------|--------------|--------|--------------|
|          |                                                                    |                           | FC     | DE           | FC     | DE           |
| Acaa2    | acetyl-Coenzyme A acyltransferase 2                                | Ile                       | -1.335 | 0.545        | -1.404 | <b>1.000</b> |
| Aldh2    | aldehyde dehydrogenase 2, mitochondrial                            | Trp, Phe                  | -1.307 | <b>0.985</b> | -1.418 | <b>1.000</b> |
| Aldh4a1  | aldehyde dehydrogenase 4 family, member A1                         | Pro, Trp                  | -1.256 | 0.535        | -1.335 | <b>1.000</b> |
| Aldh9a1  | aldehyde dehydrogenase 9, subfamily A1                             | Trp, Phe                  | -1.205 | 0.050        | -1.361 | <b>1.000</b> |
| Bckdhh   | branched chain ketoacid dehydrogenase E1, beta polypeptide         | Val, Leu, Ile             | -1.357 | <b>0.988</b> | -1.458 | <b>1.000</b> |
| Ech1     | enoyl coenzyme A hydratase 1, peroxisomal                          | Val, Leu, Ile             | -1.366 | 0.674        | -1.458 | <b>1.000</b> |
| Ehhadh   | enoyl-Coenzyme A, hydratase/3-hydroxyacyl Coenzyme A dehydrogenase | Trp, Val, Leu, Ile        | -1.486 | <b>0.984</b> | -1.908 | <b>1.000</b> |
| Gcdh     | glutaryl-Coenzyme A dehydrogenase                                  | Trp                       | -1.385 | <b>0.999</b> | -1.361 | <b>1.000</b> |
| Gpt      | glutamic pyruvic transaminase, soluble                             | Ala                       | -1.247 | 0.818        | -1.408 | <b>1.000</b> |
| Gpt2     | glutamic pyruvate transaminase (alanine aminotransferase) 2        | Ala                       | -1.495 | <b>0.999</b> | -1.592 | <b>1.000</b> |
| Maob     | monoamine oxidase B                                                | Trp, Phe                  | -1.484 | <b>0.994</b> | -1.631 | <b>1.000</b> |
| Mccc1    | methylcrotonoyl-Coenzyme A carboxylase 1 (alpha)                   | Leu                       | -1.255 | 0.705        | -1.309 | <b>1.000</b> |
| Mccc2    | methylcrotonoyl-Coenzyme A carboxylase 2 (beta)                    | Leu                       | -1.285 | 0.871        | -1.300 | <b>1.000</b> |
| Prodh    | proline dehydrogenase                                              | Pro                       | -1.250 | 0.397        | -1.351 | <b>1.000</b> |
| Aldh1a1  | aldehyde dehydrogenase 1 family, member A1                         | Val, Trp                  | 1.470  | <b>1.000</b> | 1.587  | <b>1.000</b> |
| Bckdha   | branched chain ketoacid dehydrogenase E1, alpha polypeptide        | Val, Leu, Ile             | -1.309 | <b>0.970</b> | -1.311 | <b>0.999</b> |
| Ivd      | isovaleryl coenzyme A dehydrogenase                                | Leu                       | -1.230 | 0.021        | -1.319 | <b>0.999</b> |
| Aldh1a2  | aldehyde dehydrogenase 1 family, member A2                         | Val, Trp                  | 1.292  | 0.209        | 1.319  | <b>0.999</b> |
| Abat     | 4-aminobutyrate aminotransferase                                   | Val                       | 1.317  | 0.937        | 1.329  | <b>0.999</b> |
| Acadv1   | acyl-Coenzyme A dehydrogenase, very long chain                     | Val, Leu, Ile             | -1.232 | 0.106        | -1.267 | <b>0.998</b> |
| Hadh     | hydroxyacyl-Coenzyme A dehydrogenase                               | Ile, Trp                  | -1.220 | 0.040        | -1.264 | <b>0.994</b> |
| H2-Ke6   | H2-K region expressed gene 6                                       | Trp                       | -1.114 | 0.011        | -1.220 | <b>0.990</b> |
| Maoa     | monoamine oxidase A                                                | Trp, Phe                  | 1.222  | 0.872        | 1.276  | <b>0.976</b> |
| Pcca     | propionyl-Coenzyme A carboxylase, alpha polypeptide                | Val, Ile                  | -1.133 | 0.014        | -1.209 | <b>0.975</b> |
| Hsd17b10 | hydroxysteroid (17-beta) dehydrogenase 10                          | Trp, Ile                  | -1.309 | <b>1.000</b> | -1.235 | 0.937        |
| Bcat2    | branched chain aminotransferase 2, mitochondrial                   | Val, Ile                  | -1.302 | <b>1.000</b> | -1.225 | 0.838        |
| Kmo      | kynurenine 3-monooxygenase (kynurenine 3-hydroxylase)              | Trp                       | 1.248  | <b>0.957</b> | 1.139  | 0.032        |

FC, fold change; DE, posterior probability of differential expression; genes with DE  $\geq$  0.950 (bolded) are significantly regulated.



**Supplemental Table 7. Metabolite measurements from CH, HF, and PH hearts.**

| Metabolites         | Sham-CH<br>(n=6) | CH<br>(n=6)      | Sham-HF<br>(n=6) | HF<br>(n=6)     | Sed<br>(n=6)    | PH (Run)<br>(n=6) |
|---------------------|------------------|------------------|------------------|-----------------|-----------------|-------------------|
| Acylcarnitine       |                  |                  |                  |                 |                 |                   |
| C0                  | 1076.580±97.603  | 957.148±118.173* | 985.941±77.057   | 727.739±91.744* | 1116.819±77.572 | 1075.371±96.877   |
| C2                  | 116.975±9.806    | 130.096±33.841   | 150.543±18.575   | 219.455±32.981* | 136.486±22.294  | 118.301±24.004    |
| C3                  | 5.005±0.775      | 3.761±0.498*     | 6.552±0.418      | 5.008±0.826*    | 5.736±0.560     | 4.513±0.611*      |
| C4/Ci4              | 1.562±0.507      | 1.291±0.278      | 1.904±0.351      | 2.522±0.868     | 1.167±0.353     | 1.278±0.757       |
| C5:1                | 1.985±0.207      | 1.979±0.230      | 1.794±0.317      | 1.982±0.281     | 1.372±0.177     | 1.102±0.171*      |
| C5                  | 0.810±0.170      | 1.007±0.163      | 0.826±0.144      | 1.101±0.420     | 0.595±0.124     | 0.656±0.191       |
| C4-OH               | 2.699±0.459      | 2.751±1.020      | 3.648±0.557      | 7.705±3.270*    | 2.419±0.875     | 1.236±0.588*      |
| C6                  | 0.303±0.070      | 0.314±0.087      | 0.372±0.070      | 0.558±0.160*    | 0.216±0.050     | 0.156±0.060       |
| C5-OH               | 2.403±0.378      | 2.920±0.371*     | 2.181±0.276      | 2.295±0.537     | 1.758±0.144     | 2.173±0.472       |
| C3-DC               | 3.267±0.275      | 2.912±0.310      | 3.024±0.276      | 2.542±0.216*    | 2.511±0.187     | 2.154±0.318       |
| C4-DC/Ci4-DC        | 10.255±0.991     | 5.652±1.590*     | 8.968±0.560      | 4.194±0.142*    | 6.699±0.617     | 5.939±0.689       |
| C8:1                | 0.425±0.105      | 0.378±0.055      | 0.330±0.065      | 0.344±0.078     | 0.175±0.040     | 0.131±0.038       |
| C8                  | 0.188±0.032      | 0.163±0.026      | 0.213±0.064      | 0.232±0.071     | 0.105±0.017     | 0.103±0.036       |
| C5-DC               | 0.144±0.080      | 0.142±0.014      | 0.227±0.082      | 0.125±0.020*    | 0.096±0.041     | 0.102±0.013       |
| C8:1-OH/C6:1-DC     | 0.089±0.040      | 0.117±0.020      | 0.085±0.034      | 0.127±0.048     | 0.096±0.022     | 0.071±0.027       |
| C6-DC/C8-OH         | 0.191±0.052      | 0.212±0.064      | 0.173±0.028      | 0.316±0.086*    | 0.252±0.067     | 0.150±0.031*      |
| C10:3               | 0.285±0.070      | 0.276±0.040      | 0.238±0.032      | 0.254±0.041     | 0.063±0.020     | 0.051±0.011       |
| C10:2               | 0.046±0.009      | 0.054±0.015      | 0.054±0.030      | 0.044±0.016     | 0.030±0.023     | 0.019±0.007       |
| C10:1               | 0.137±0.033      | 0.113±0.032      | 0.145±0.035      | 0.136±0.043     | 0.096±0.029     | 0.069±0.023       |
| C10                 | 0.229±0.038      | 0.178±0.073      | 0.262±0.096      | 0.313±0.106     | 0.138±0.033     | 0.117±0.048       |
| C7-DC               | 0.037±0.018      | 0.027±0.008      | 0.039±0.017      | 0.040±0.024     | 0.051±0.018     | 0.035±0.019       |
| C8:1-DC             | 0.027±0.016      | 0.042±0.009      | 0.032±0.012      | 0.040±0.011     | 0.044±0.014     | 0.024±0.009*      |
| C10-OH/C8-DC        | 0.148±0.033      | 0.130±0.049      | 0.134±0.029      | 0.251±0.096*    | 0.183±0.091     | 0.080±0.007*      |
| C12:2               | 0.043±0.023      | 0.038±0.015      | 0.028±0.013      | 0.031±0.010     | 0.033±0.013     | 0.023±0.005       |
| C12:1               | 0.223±0.017      | 0.205±0.065      | 0.228±0.037      | 0.232±0.098     | 0.174±0.053     | 0.105±0.013*      |
| C12                 | 0.272±0.058      | 0.242±0.073      | 0.503±0.192      | 0.692±0.257     | 0.337±0.132     | 0.183±0.067*      |
| C12:2-OH/C10:2-DC   | 0.168±0.071      | 0.116±0.017*     | 0.144±0.025      | 0.121±0.031     | 0.094±0.033     | 0.055±0.004*      |
| C12:1-OH/C10:1-DC   | 0.120±0.029      | 0.128±0.044      | 0.120±0.020      | 0.212±0.081*    | 0.107±0.021     | 0.069±0.014*      |
| C12-OH/C10-DC       | 0.113±0.048      | 0.105±0.036      | 0.151±0.023      | 0.301±0.121*    | 0.220±0.112     | 0.106±0.034*      |
| C14:3               | 0.029±0.010      | 0.017±0.010      | 0.029±0.007      | 0.024±0.013     | 0.031±0.011     | 0.019±0.006       |
| C14:2               | 0.338±0.102      | 0.247±0.063      | 0.401±0.103      | 0.425±0.091     | 0.208±0.056     | 0.133±0.053*      |
| C14:1               | 0.588±0.125      | 0.583±0.276      | 1.025±0.209      | 1.407±0.400     | 0.782±0.257     | 0.442±0.155*      |
| C14                 | 0.762±0.182      | 0.778±0.316      | 1.632±0.516      | 2.465±0.894     | 1.014±0.324     | 0.594±0.279       |
| C14:3-OH/C12:3-DC   | 0.013±0.004      | 0.017±0.009      | 0.012±0.008      | 0.013±0.014     | 0.016±0.011     | 0.011±0.007       |
| C14:2-OH/C12:2-DC   | 0.144±0.052      | 0.139±0.055      | 0.139±0.028      | 0.240±0.079*    | 0.130±0.058     | 0.074±0.024       |
| C14:1-OH/C12:1-DC   | 0.229±0.036      | 0.273±0.110      | 0.338±0.065      | 0.670±0.230*    | 0.380±0.119     | 0.172±0.051*      |
| C14-OH/C12-DC       | 0.219±0.039      | 0.222±0.114      | 0.401±0.071      | 0.793±0.286*    | 0.532±0.230     | 0.193±0.054*      |
| C16:3               | 0.077±0.017      | 0.075±0.037      | 0.113±0.022      | 0.183±0.048*    | 0.074±0.032     | 0.038±0.012       |
| C16:2               | 0.508±0.108      | 0.490±0.274      | 1.052±0.284      | 1.688±0.375*    | 0.455±0.186     | 0.213±0.092*      |
| C16:1               | 0.684±0.156      | 0.802±0.433      | 1.640±0.479      | 2.743±0.582*    | 1.117±0.476     | 0.584±0.258*      |
| C16                 | 2.373±0.745      | 2.639±1.131      | 5.590±2.191      | 8.142±2.650     | 2.540±0.818     | 1.656±1.145       |
| C16:3-OH/C14:3-DC   | 0.021±0.006      | 0.020±0.011      | 0.027±0.008      | 0.048±0.014*    | 0.022±0.011     | 0.015±0.003       |
| C16:2-OH/C14:2-DC   | 0.190±0.048      | 0.210±0.080      | 0.302±0.065      | 0.512±0.142*    | 0.220±0.084     | 0.096±0.031*      |
| C16:1-OH/C14:1-DC   | 0.222±0.041      | 0.300±0.136      | 0.465±0.136      | 0.909±0.265*    | 0.441±0.195     | 0.189±0.068*      |
| C16-OH/C14-DC       | 0.426±0.091      | 0.552±0.312      | 0.977±0.333      | 1.960±0.494*    | 0.930±0.531     | 0.310±0.130*      |
| C18:3               | 0.487±0.077      | 0.629±0.358      | 1.067±0.301      | 1.572±0.231*    | 0.438±0.159     | 0.199±0.120*      |
| C18:2               | 2.768±0.822      | 3.757±2.426      | 7.187±2.752      | 12.196±2.736*   | 2.098±0.900     | 1.249±1.152       |
| C18:1               | 2.484±0.721      | 3.232±1.970      | 6.400±2.280      | 10.956±2.800*   | 2.603±0.924     | 1.702±1.353       |
| C18                 | 1.052±0.239      | 1.000±0.463      | 2.233±1.014      | 3.055±1.134     | 0.841±0.218     | 0.597±0.356       |
| C18:3-OH/C16:3-DC   | 0.093±0.023      | 0.104±0.043      | 0.140±0.030      | 0.258±0.078*    | 0.096±0.044     | 0.036±0.008*      |
| C18:2-OH/C16:2-DC   | 0.620±0.102      | 1.052±0.749      | 1.464±0.445      | 3.353±0.835*    | 0.761±0.402     | 0.276±0.127*      |
| C18:1-OH/C16:1-DC   | 0.556±0.140      | 0.898±0.641      | 1.343±0.417      | 3.015±0.627*    | 1.056±0.547     | 0.370±0.148*      |
| C18-OH/C16-DC       | 0.184±0.047      | 0.195±0.085      | 0.338±0.083      | 0.638±0.156*    | 0.254±0.108     | 0.120±0.065*      |
| C20:4               | 0.269±0.060      | 0.220±0.090      | 0.352±0.047      | 0.354±0.117     | 0.201±0.060     | 0.090±0.118       |
| C20:3               | 0.094±0.020      | 0.102±0.047      | 0.156±0.030      | 0.233±0.071*    | 0.057±0.022     | 0.061±0.045       |
| C20:2               | 0.093±0.020      | 0.099±0.063      | 0.217±0.055      | 0.469±0.078*    | 0.075±0.024     | 0.062±0.051       |
| C20:1               | 0.151±0.027      | 0.137±0.083      | 0.331±0.134      | 0.634±0.139*    | 0.095±0.055     | 0.086±0.067       |
| C20                 | 0.066±0.018      | 0.082±0.036      | 0.132±0.029      | 0.211±0.050*    | 0.054±0.014     | 0.037±0.024       |
| C20:3-OH/C18:3-DC   | 0.045±0.013      | 0.045±0.009      | 0.048±0.007      | 0.066±0.023     | 0.039±0.025     | 0.019±0.014       |
| C20:2-OH/C18:2-DC   | 0.073±0.019      | 0.082±0.028      | 0.098±0.018      | 0.223±0.079*    | 0.070±0.044     | 0.062±0.017       |
| C20:1-OH/C18:1-DC   | 0.038±0.014      | 0.045±0.030      | 0.078±0.037      | 0.166±0.063*    | 0.047±0.016     | 0.025±0.006*      |
| C20-OH/C18-DC/C22:6 | 0.077±0.019      | 0.061±0.027      | 0.109±0.023      | 0.082±0.042     | 0.028±0.018     | 0.012±0.014       |
| C22:5               | 0.038±0.014      | 0.032±0.022      | 0.049±0.024      | 0.039±0.030     | 0.015±0.010     | 0.025±0.023       |
| C22:4               | 0.016±0.009      | 0.022±0.013      | 0.029±0.011      | 0.016±0.011     | 0.018±0.009     | 0.011±0.012       |
| C22:3               | 0.006±0.005      | 0.005±0.004      | 0.007±0.005      | 0.009±0.009     | 0.010±0.010     | 0.007±0.004       |
| C22:2               | 0.014±0.006      | 0.010±0.006      | 0.010±0.004      | 0.016±0.008     | 0.008±0.003     | 0.008±0.007       |
| C22:1               | 0.044±0.007      | 0.047±0.013      | 0.046±0.021      | 0.052±0.008     | 0.043±0.013     | 0.031±0.007       |
| C22                 | 0.024±0.008      | 0.030±0.015      | 0.022±0.009      | 0.031±0.019     | 0.023±0.010     | 0.012±0.004*      |

| Metabolites         | Sham-CH<br>(n=6) | CH<br>(n=6)   | Sham-HF<br>(n=6) | HF<br>(n=6)    | Sed<br>(n=6) | PH (Run)<br>(n=6) |
|---------------------|------------------|---------------|------------------|----------------|--------------|-------------------|
| <b>Organic Acid</b> |                  |               |                  |                |              |                   |
| lactate             | 3380.2±314.5     | 3789.5±1032.9 | 4459.8±383.9     | 6975.6±2021.1* | 5955.1±786.4 | 4558.7±544.6*     |
| succinate           | 362.5±12.6       | 340.8±48.6    | 447.3±33.1       | 538.2±72.5*    | 472.4±31.4   | 319.1±31.0*       |
| malate              | 1007.5±92.9      | 858.4±110.4   | 1030.6±62.8      | 752.7±85.6*    | 726.6±125.6  | 462.2±39.7*       |
| citrate             | 422.5±26.3       | 386.1±40.3    | 375.3±28.3       | 312.8±55.9     | 371.6±48.8   | 343.9±33.2        |
| pyruvate            | 20.7±2.3         | 22.1±3.5      | 23.5±2.8         | 22.1±3.4       | 20.0±2.4     | 20.1±3.1          |
| fumarate            | 125.5±12.7       | 104.0±12.0*   | 133.4±9.6        | 97.4±10.7*     | 109.7±12.8   | 66.8±5.5*         |
| a-KG                | 10.2±1.0         | 10.0±1.7      | 10.6±2.1         | 7.8±1.0*       | 7.6±1.1      | 7.0±0.9           |
| Lactate/Pyruvate    | 164.9±24.2       | 172.8±44.9    | 190.5±12.1       | 324.7±122.0*   | 300.2±36.2   | 227.8±16.4*       |
| <b>Amino Acid</b>   |                  |               |                  |                |              |                   |
| Glx                 | 7493.8±812.1     | 6603.5±639.1* | 6621.1±708.5     | 6156.5±582.7   | 9632.9±995.6 | 9486.3±945.4      |
| Gly                 | 657.0±52.7       | 668.8±101.4   | 625.5±56.9       | 676.9±62.9     | 563.3±67.7   | 570.0±60.3        |
| Ala                 | 1917.2±196.4     | 2072.6±133.1  | 2061.4±124.5     | 2166.5±241.1   | 1650.9±119.2 | 1382.3±70.9*      |
| Ser                 | 1301.8±133.2     | 1533.6±135.2* | 1201.4±121.9     | 1714.8±73.7*   | 938.7±77.5   | 979.1±67.7        |
| Leu/Ile             | 510.9±66.0       | 427.8±30.6*   | 463.1±49.7       | 510.5±56.7     | 327.5±16.5   | 293.2±18.7*       |
| Asx                 | 1594.9±183.9     | 1612.3±184.6  | 1538.8±170.1     | 1994.8±287.2*  | 2154.7±356.0 | 1616.7±217.4*     |
| Pro                 | 98.6±8.0         | 133.7±28.0*   | 103.6±7.2        | 146.8±15.3*    | 68.0±9.6     | 72.7±4.3          |
| Val                 | 429.3±37.8       | 348.3±47.3*   | 353.3±34.3       | 411.2±66.6     | 201.0±20.2   | 214.3±29.7        |
| Met                 | 79.4±4.6         | 92.2±9.4*     | 77.2±8.9         | 97.1±6.1*      | 77.5±8.7     | 80.2±11.7         |
| His                 | 331.0±50.4       | 211.8±16.1*   | 295.6±40.4       | 250.7±39.6     | 242.1±31.1   | 242.8±26.9        |
| Phe                 | 80.3±8.7         | 89.1±11.9     | 81.2±7.6         | 104.8±7.1*     | 57.7±5.6     | 58.6±5.2          |
| Tyr                 | 97.5±24.8        | 104.2±13.7    | 89.5±12.7        | 102.4±10.1     | 61.4±8.6     | 72.8±11.4         |
| Orn                 | 36.1±3.8         | 41.8±5.3      | 53.5±17.2        | 45.5±6.9       | 31.4±3.9     | 34.0±3.4          |
| Cit                 | 293.5±50.9       | 264.4±36.3    | 288.8±27.5       | 264.9±30.5     | 207.0±16.7   | 207.6±21.4        |
| Arg                 | 298.4±31.6       | 257.4±14.5*   | 306.2±20.9       | 287.5±23.5     | 235.7±10.0   | 266.8±15.5*       |

\*p &lt; 0.05 compared to corresponding controls.

**Supplemental Table 8: Metabolite measurements from CH and HF plasma.**

| Metabolites          | Sham-CH<br>(n=5) | CH<br>(n=6)  | Sham-HF<br>(n=7) | HF<br>(n=6)  |
|----------------------|------------------|--------------|------------------|--------------|
| <b>Acylcarnitine</b> |                  |              |                  |              |
| P-C0                 | 30.5±6.7         | 31.6±5.6     | 30.3±5.8         | 30.2±4.9     |
| P-C2                 | 17.4±4.7         | 19.2±3.5     | 16.3±4.0         | 14.4±2.3     |
| P-C3                 | 0.36±0.05        | 0.31±0.06    | 0.30±0.06        | 0.20±0.04*   |
| P-C4/Ci4             | 0.40±0.17        | 0.33±0.10    | 0.86±0.40        | 0.76±0.36    |
| P-C5:1               | 0.30±0.06        | 0.31±0.07    | 0.36±0.09        | 0.30±0.05    |
| P-C5                 | 0.112±0.021      | 0.124±0.066  | 0.147±0.063      | 0.124±0.046  |
| P-C4-OH              | 0.157±0.060      | 0.213±0.061  | 0.162±0.029      | 0.116±0.029* |
| P-C6                 | 0.113±0.031      | 0.104±0.033  | 0.105±0.045      | 0.097±0.024  |
| P-C5-OH              | 0.084±0.019      | 0.089±0.017  | 0.081±0.022      | 0.058±0.011* |
| P-C3-DC              | 0.030±0.014      | 0.022±0.008  | 0.019±0.008      | 0.011±0.006  |
| P-C4-DC/Ci4-DC       | 0.026±0.018      | 0.044±0.009  | 0.029±0.030      | 0.020±0.018  |
| P-C8:1               | 0.023±0.009      | 0.027±0.010  | 0.021±0.008      | 0.021±0.008  |
| P-C8                 | 0.209±0.177      | 0.205±0.091  | 0.142±0.096      | 0.133±0.076  |
| P-C5-DC              | 0.013±0.018      | 0.018±0.022  | 0.007±0.018      | 0.002±0.006  |
| P-C8:1-OH/C6:1-DC    | 0.217±0.090      | 0.174±0.123  | 0.129±0.043      | 0.065±0.061  |
| P-C6-DC              | 0.039±0.006      | 0.023±0.013* | 0.038±0.013      | 0.015±0.011* |
| P-C10:3              | 0.035±0.010      | 0.037±0.014  | 0.031±0.018      | 0.024±0.009  |
| P-C10:2              | 0.008±0.005      | 0.016±0.009  | 0.017±0.010      | 0.010±0.010  |
| P-C10:1              | 0.027±0.016      | 0.032±0.009  | 0.026±0.006      | 0.031±0.014  |
| P-C10                | 0.027±0.020      | 0.027±0.017  | 0.027±0.016      | 0.031±0.017  |
| P-C7-DC              | 0.009±0.007      | 0.017±0.011  | 0.012±0.007      | 0.020±0.015  |
| P-C8:1-DC            | 0.060±0.016      | 0.064±0.023  | 0.048±0.007      | 0.046±0.021  |
| P-C10-OH/C8-DC       | 0.014±0.031      | 0.252±0.258  | 0.027±0.072      | 0.071±0.112  |
| P-C12:1              | 0.042±0.026      | 0.038±0.030  | 0.037±0.010      | 0.049±0.014  |
| P-C12                | 0.082±0.012      | 0.085±0.011  | 0.075±0.013      | 0.076±0.014  |
| P-C12-OH/C10-DC      | 0.007±0.006      | 0.012±0.010  | 0.005±0.007      | 0.006±0.006  |
| P-C14:2              | 0.046±0.040      | 0.035±0.022  | 0.037±0.037      | 0.034±0.026  |
| P-C14:1              | 0.060±0.019      | 0.068±0.017  | 0.063±0.016      | 0.065±0.011  |
| P-C14                | 0.053±0.012      | 0.063±0.021  | 0.066±0.017      | 0.060±0.012  |
| P-C14:1-OH           | 0.016±0.010      | 0.025±0.006  | 0.017±0.004      | 0.020±0.004  |
| P-C14-OH/C12-DC      | 0.009±0.004      | 0.013±0.005  | 0.010±0.003      | 0.010±0.001  |
| P-C16:2              | 0.021±0.009      | 0.024±0.005  | 0.021±0.010      | 0.020±0.005  |
| P-C16:1              | 0.052±0.008      | 0.057±0.019  | 0.050±0.013      | 0.054±0.008  |
| P-C16                | 0.126±0.031      | 0.132±0.037  | 0.153±0.020      | 0.144±0.041  |
| P-C16:1-OH/C14:1-DC  | 0.017±0.007      | 0.023±0.005  | 0.013±0.003      | 0.017±0.005  |
| P-C16-OH/C14-DC      | 0.010±0.003      | 0.011±0.003  | 0.014±0.005      | 0.011±0.004  |
| P-C18:2              | 0.081±0.012      | 0.088±0.019  | 0.075±0.011      | 0.079±0.017  |
| P-C18:1              | 0.164±0.034      | 0.182±0.051  | 0.162±0.017      | 0.166±0.046  |
| P-C18                | 0.034±0.007      | 0.036±0.011  | 0.043±0.010      | 0.038±0.010  |
| P-C18:2-OH           | 0.010±0.004      | 0.016±0.005* | 0.009±0.006      | 0.011±0.002  |
| P-C18:1-OH/C16:1-DC  | 0.027±0.010      | 0.029±0.005  | 0.022±0.003      | 0.026±0.003* |
| P-C18-OH/C16-DC      | 0.008±0.017      | 0.037±0.061  | 0.027±0.047      | 0.014±0.035  |
| P-C20:4              | 0.029±0.009      | 0.028±0.007  | 0.031±0.007      | 0.032±0.006  |
| P-C20                | 0.004±0.001      | 0.004±0.001  | 0.006±0.002      | 0.004±0.002  |
| P-C22                | 0.003±0.002      | 0.004±0.001  | 0.005±0.001      | 0.003±0.002  |
| <b>Amino Acid</b>    |                  |              |                  |              |
| P-Glx                | 50.3±9.7         | 50.1±7.6     | 53.9±5.7         | 54.3±6.5     |
| P-Gly                | 267.8±61.4       | 236.4±47.0   | 220.2±52.8       | 232.2±28.4   |
| P-Ala                | 396.8±85.8       | 352.8±91.4   | 332.1±29.5       | 349.7±57.6   |
| P-Ser                | 114.3±14.4       | 105.7±14.0   | 99.6±18.2        | 104.9±18.5   |
| P-Leu/Ile            | 117.0±21.0       | 111.3±23.6   | 108.3±17.9       | 157.4±21.4*  |
| P-Asx                | 127.9±69.4       | 157.8±46.9   | 131.0±70.4       | 92.3±39.3    |
| P-Pro                | 59.6±11.3        | 56.7±11.0    | 49.5±4.9         | 55.6±7.9     |
| P-Val                | 118.5±14.8       | 113.5±22.4   | 117.5±18.5       | 133.2±15.6   |
| P-Met                | 47.8±6.3         | 50.7±6.4     | 40.0±3.6         | 45.2±4.7*    |
| P-His                | 17.7±6.6         | 18.7±2.5     | 19.2±4.1         | 23.4±3.9     |
| P-Phe                | 52.4±4.3         | 55.4±8.9     | 50.2±5.2         | 64.6±5.4*    |
| P-Tyr                | 68.9±7.8         | 67.6±12.5    | 61.1±9.9         | 65.4±8.8     |
| P-Orn                | 42.3±5.8         | 39.5±9.2     | 31.9±4.3         | 38.4±6.3     |
| P-Cit                | 54.5±12.9        | 54.9±10.5    | 43.5±7.9         | 60.4±11.7*   |
| P-Arg                | 93.4±19.6        | 87.7±18.0    | 86.4±10.5        | 90.5±14.9    |

\*p &lt; 0.05 compared to sham control.

**Supplemental Table 9. Cardiac hypertrophy in PH model.**

| Parameters              | Sedentary       | PH (Run)         | p-value |
|-------------------------|-----------------|------------------|---------|
| N                       | 15              | 15               |         |
| Body weight (g)         | 20.84 ± 1.50    | 21.67 ± 1.14     | 0.09    |
| Bi-ventricle weight (g) | 0.0889 ± 0.0102 | 0.1019 ± 0.0057* | <0.001  |
| Bi-ventricle w/BW       | 4.26 ± 0.29     | 4.71 ± 0.33*     | <0.001  |

\*p < 0.05 compared to sedentary control. w/BW, weight/body weight ratio; g, grams

**Supplemental Table 10. Differentially expressed genes in PH myocardium.**

| Probe ID | Symbol  | Gene Name                                                            | PH (Run) |              |
|----------|---------|----------------------------------------------------------------------|----------|--------------|
|          |         |                                                                      | FC       | DE           |
| 10359867 | Lirc52  | leucine rich repeat containing 52                                    | -1.553   | <b>1.000</b> |
| 10476793 | NA      | NA                                                                   | -1.351   | <b>0.994</b> |
| 10476791 | NA      | NA                                                                   | -1.443   | <b>0.989</b> |
| 10472426 | Xirp2   | xin actin-binding repeat containing 2                                | 1.539    | <b>0.988</b> |
| 10488108 | Esf1    | ESF1, nucleolar pre-rRNA processing protein, homolog (S. cerevisiae) | 1.513    | <b>0.986</b> |
| 10452516 | Ankrd12 | ankyrin repeat domain 12                                             | 1.378    | <b>0.981</b> |

FC, fold change; DE, posterior probability of differential expression; genes with DE  $\geq$  0.950 (bolded) are significantly regulated.

# Supplemental Figure 1

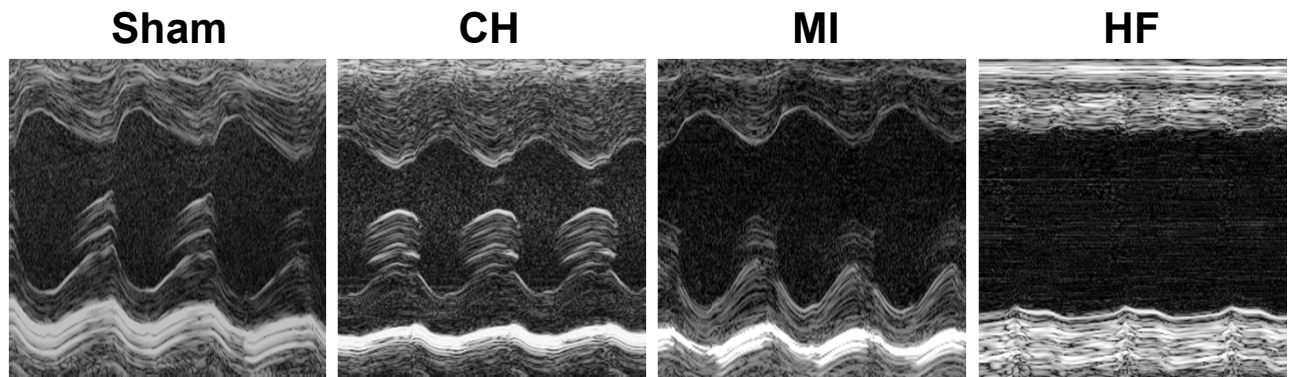

# Supplemental Figure 2

**A.**

## TCA

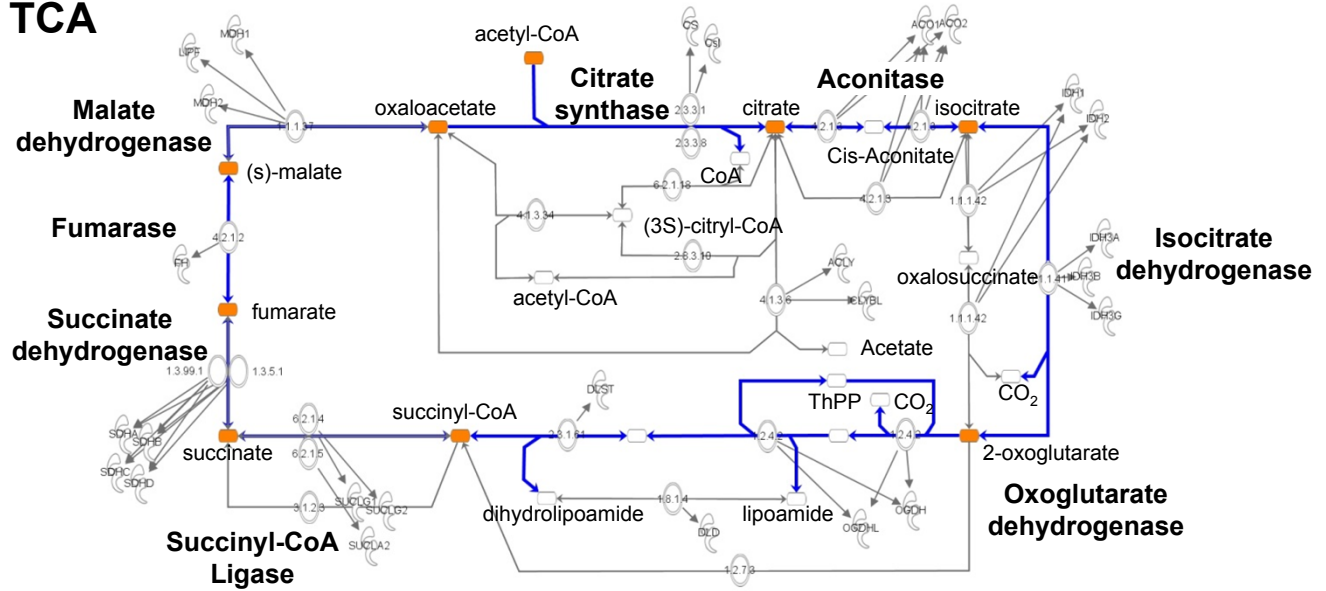

**B.**

## ETC/OXPHOS

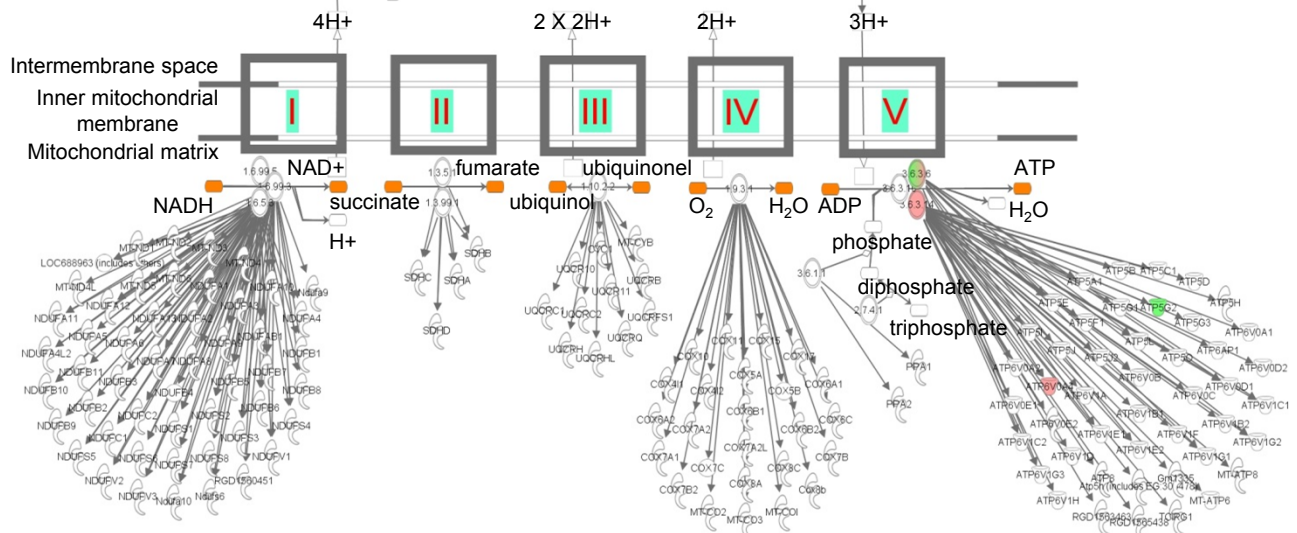

### Supplemental Figure 3

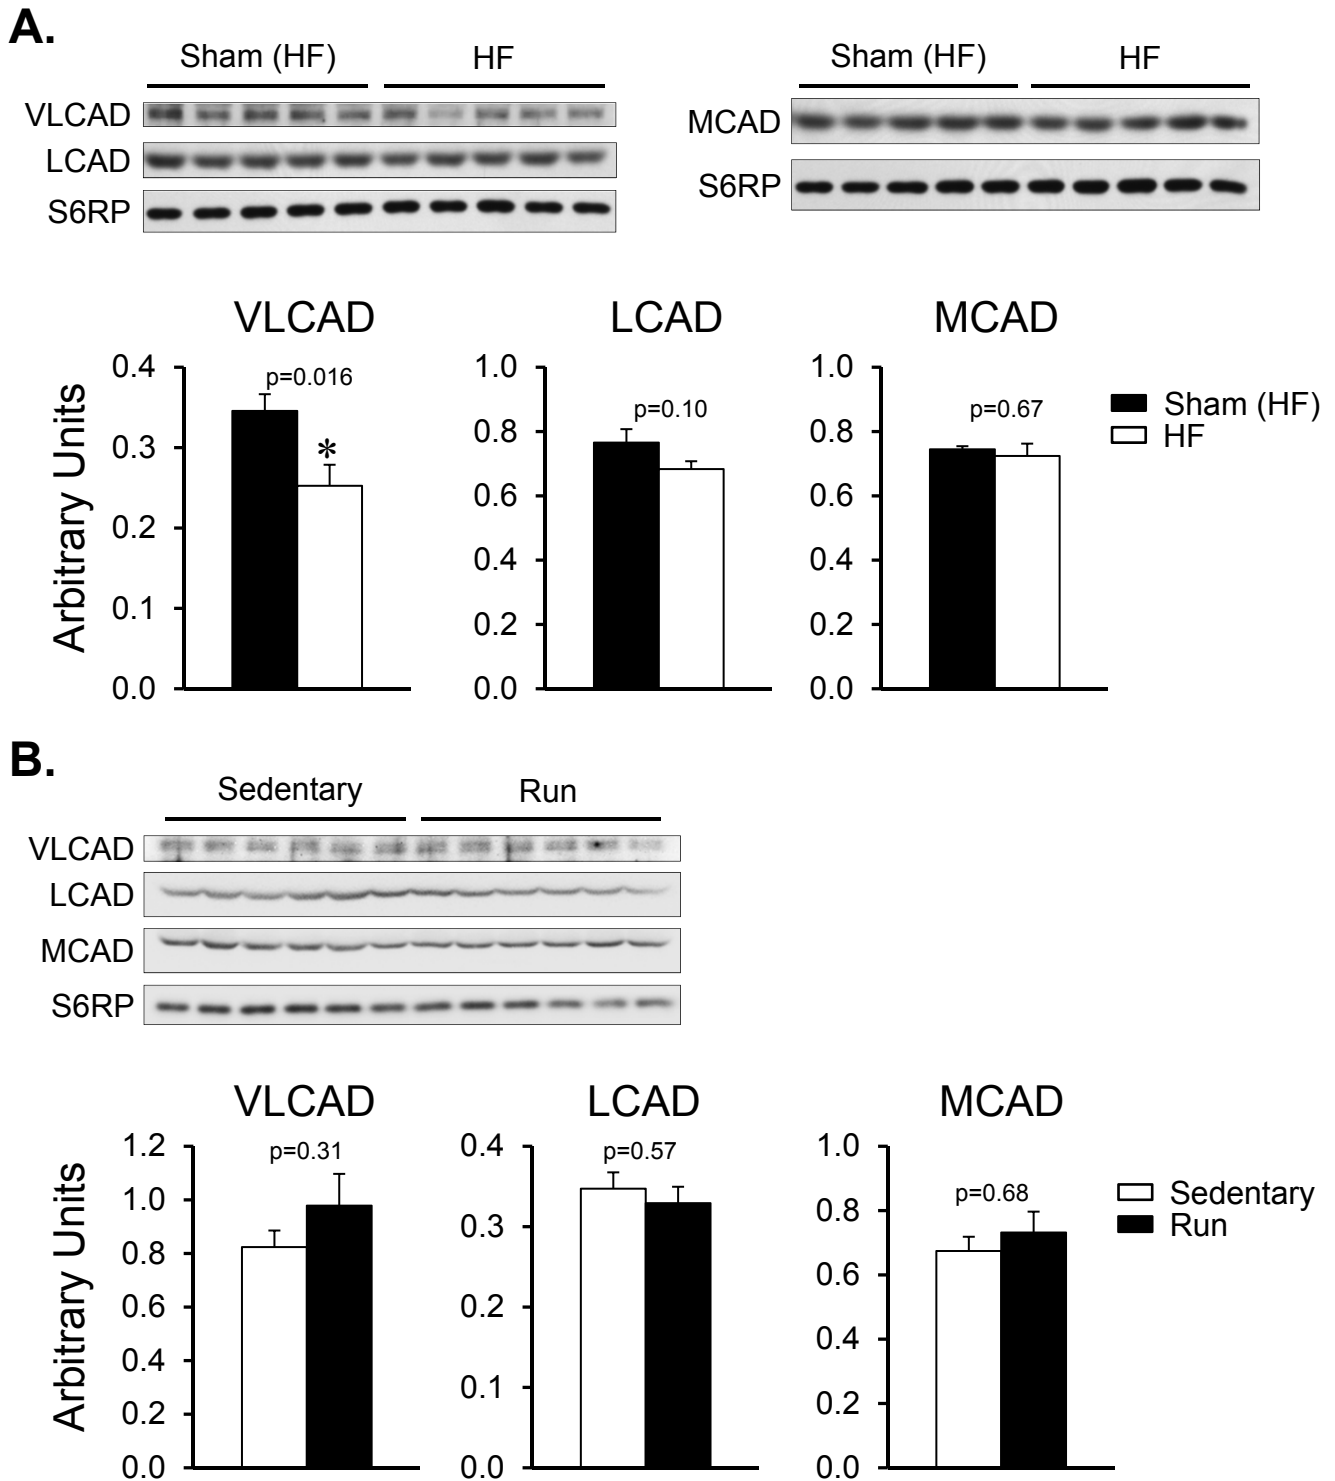



**SUPPLEMENTAL FIGURE LEGENDS**

**Figure 1. Representative ventricular remodeling in compensated (CH) and decompensated (HF) pressure overload cardiac hypertrophy models.** (A) Representative M-mode echocardiographic images through the mid-LV from 12-week-old female C57BL6/J mice one month after being subjected to sham, transverse aortic constriction (CH), small apical myocardial infarction (MI), or combined transverse aortic constriction with small myocardial infarction (HF).

**Figure 2. Minimal changes in expression of myocardial genes involved in tricarboxylic acid (TCA) cycle, electron transport chain (ETC)/oxidative phosphorylation (OXPHOS) in HF.** Pathway map showing genes significantly ( $DE \geq 0.950$ ) upregulated (pink) or downregulated (green) in HF compared to sham control in canonical pathways such as (A) TCA and (B) ETC/OXPHOS identified by Ingenuity Pathway Analysis. Complexes I through V in the ETC/OXPHOS pathway are denoted as I, II, III, IV, and V. The ovals in the map represent enzyme complexes.

**Figure 3. Determination of fatty acid  $\beta$ -oxidation (FAO) protein levels in HF samples.** Representative Western blots assessing levels of protein extracted from hearts of (A) HF and corresponding sham-operated controls and (B) sedentary and wheel-exercised mice (Run) for the following proteins: acyl-Coenzyme A dehydrogenase, very long chain (VLCAD), acyl-Coenzyme A dehydrogenase, long-chain (LCAD) and medium chain (MCAD). Ribosomal protein S6 (S6RP) was used as loading control. Quantification of the blot analysis is shown at the bottom of each panel. Bars represent mean $\pm$ S.E. \* $p < 0.05$  compared with corresponding control

(n=5-6 per group).

**SUPPLEMENTAL REFERENCES**

1. Lai L, Wang M, Martin OJ, Leone TC, Vega RB, Han X, Kelly DP. A role for peroxisome proliferator-activated receptor gamma coactivator 1 (PGC-1) in the regulation of cardiac mitochondrial phospholipid biosynthesis. *J Biol Chem*. 2014;289:2250-2259.
2. Huss JM, Imahashi K, Dufour CR, Weinheimer CJ, Courtois M, Kovacs A, Giguere V, Murphy E, Kelly DP. The nuclear receptor ERRalpha is required for the bioenergetic and functional adaptation to cardiac pressure overload. *Cell Metab*. 2007;6:25-37.
3. Lai L, Leone TC, Zechner C, Schaeffer PJ, Kelly SM, Flanagan DP, Medeiros DM, Kovacs A, Kelly DP. Transcriptional coactivators PGC-1alpha and PGC-1beta control overlapping programs required for perinatal maturation of the heart. *Genes Dev*. 2008;22:1948-1961.
4. Martin OJ, Lai L, Soundarapandian MM, Leone TC, Zorzano A, Keller MP, Attie AD, Muoio DM, Kelly DP. A role for peroxisome proliferator-activated receptor gamma coactivator-1 in the control of mitochondrial dynamics during postnatal cardiac growth. *Circ Res*. 2014;114:626-636.
5. Allen DL, Harrison BC, Maass A, Bell ML, Byrnes WC, Leinwand LA. Cardiac and skeletal muscle adaptations to voluntary wheel running in the mouse. *J Appl Physiol*. 2001;90:1900-1908.

6. Huss JM, Torra IP, Staels B, Giguere V, Kelly DP. Estrogen-related receptor alpha directs peroxisome proliferator-activated receptor alpha signaling in the transcriptional control of energy metabolism in cardiac and skeletal muscle. *Mol Cell Biol.* 2004;24:9079-9091.
7. Cresci S, Wright LD, Spratt JA, Briggs FN, Kelly DP. Activation of a novel metabolic gene regulatory pathway by chronic stimulation of skeletal muscle. *Am J Physiol.* 1996;270:C1413-1420.
8. Kelly DP, Kim JJ, Billadello JJ, Hainline BE, Chu TW, Strauss AW. Nucleotide sequence of medium-chain acyl-CoA dehydrogenase mRNA and its expression in enzyme-deficient human tissue. *Proc Natl Acad Sci U S A.* 1987;84:4068-4072.
9. Hainline BE, Kahlenbeck DJ, Grant J, Strauss AW. Tissue specific and developmental expression of rat long-and medium-chain acyl-CoA dehydrogenases. *Biochim Biophys Acta.* 1993;1216:460-468.
10. Exil VJ, Roberts RL, Sims H, McLaughlin JE, Malkin RA, Gardner CD, Ni G, Rottman JN, Strauss AW. Very-long-chain acyl-coenzyme a dehydrogenase deficiency in mice. *Circ Res.* 2003;93:448-455.

11. Saks VA, Veksler VI, Kuznetsov AV, Kay L, Sikk P, Tiivel T, Tranqui L, Olivares J, Winkler K, Wiedemann F, Kunz WS. Permeabilized cell and skinned fiber techniques in studies of mitochondrial function in vivo. *Mol Cell Biochem.* 1998;184:81-100.
12. Irizarry RA, Hobbs B, Collin F, Beazer-Barclay YD, Antonellis KJ, Scherf U, Speed TP. Exploration, normalization, and summaries of high density oligonucleotide array probe level data. *Biostatistics.* 2003;4:249-264.
13. Newton MA, Kendziorski CM, Richmond CS, Blattner FR, Tsui KW. On differential variability of expression ratios: improving statistical inference about gene expression changes from microarray data. *J Comput Biol.* 2001;8:37-52.
14. Kendziorski CM, Newton MA, Lan H, Gould MN. On parametric empirical Bayes methods for comparing multiple groups using replicated gene expression profiles. *Stat Med.* 2003;22:3899-3914.
15. Millington DS, Kodo N, Norwood DL, Roe CR. Tandem mass spectrometry: a new method for acylcarnitine profiling with potential for neonatal screening for inborn errors of metabolism. *J Inherit Metab Dis.* 1990;13:321-324.
16. An J, Muoio DM, Shiota M, Fujimoto Y, Cline GW, Shulman GI, Koves TR, Stevens R, Millington D, Newgard CB. Hepatic expression of malonyl-CoA decarboxylase reverses muscle, liver and whole-animal insulin resistance. *Nat Med.* 2004;10:268-274.

17. Wu JY, Kao HJ, Li SC, Stevens R, Hillman S, Millington D, Chen YT. ENU mutagenesis identifies mice with mitochondrial branched-chain aminotransferase deficiency resembling human maple syrup urine disease. *J Clin Invest.* 2004;113:434-440.
  
18. Jensen MV, Joseph JW, Ilkayeva O, Burgess S, Lu D, Ronnebaum SM, Odegaard M, Becker TC, Sherry AD, Newgard CB. Compensatory responses to pyruvate carboxylase suppression in islet beta-cells. Preservation of glucose-stimulated insulin secretion. *J Biol Chem.* 2006;281:22342-22351.
